# Supplementary material for: 3-Bromopyruvate overcomes cetuximab resistance in human colorectal cancer cells by inducing autophagy-dependent ferroptosis
Source: PubMed Central journal article supplement (PMC10581902; doi:10.1038/s41417-023-00648-5), 2023-08-09

Figure 2B

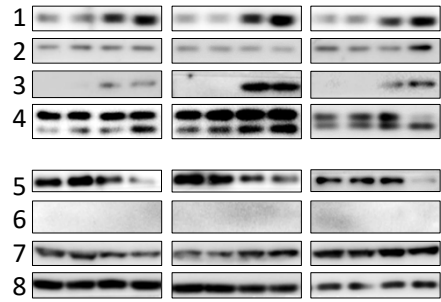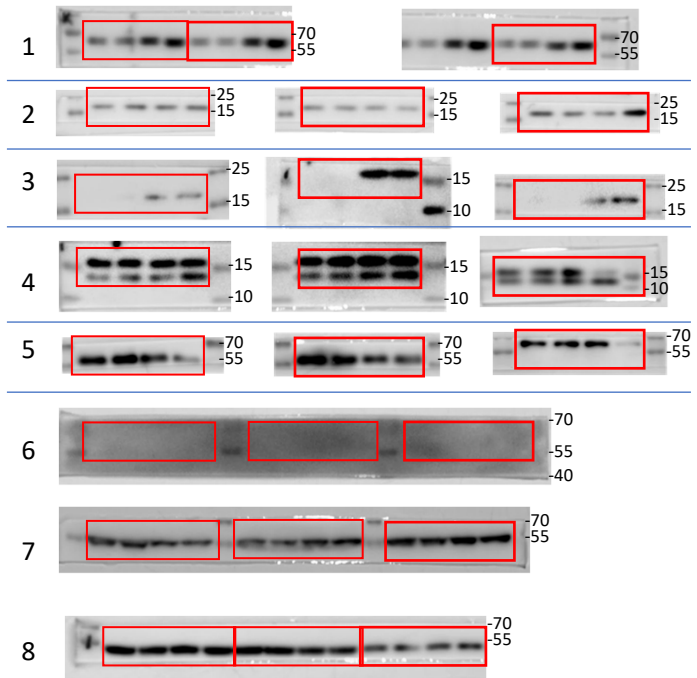

Figure 3A

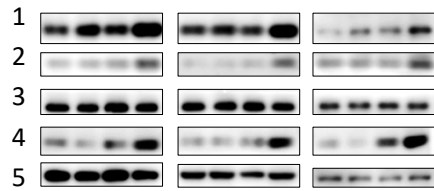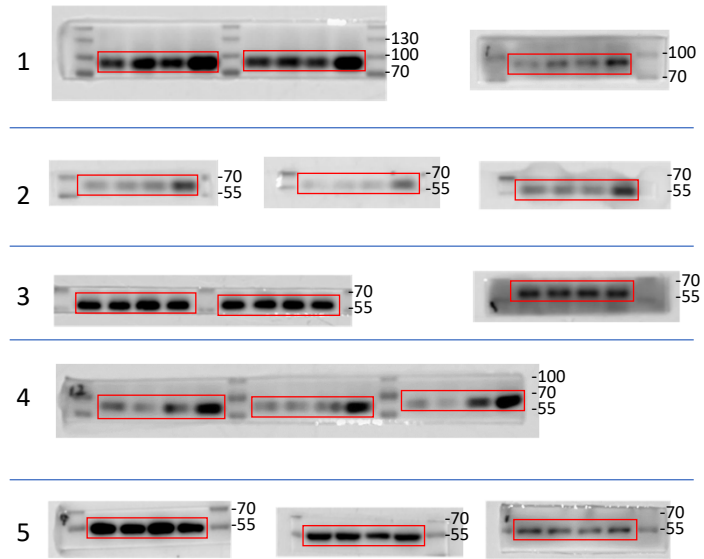

Figure 3B

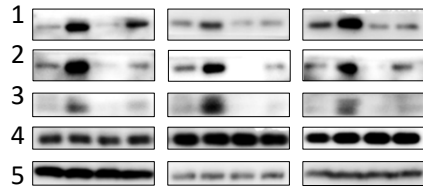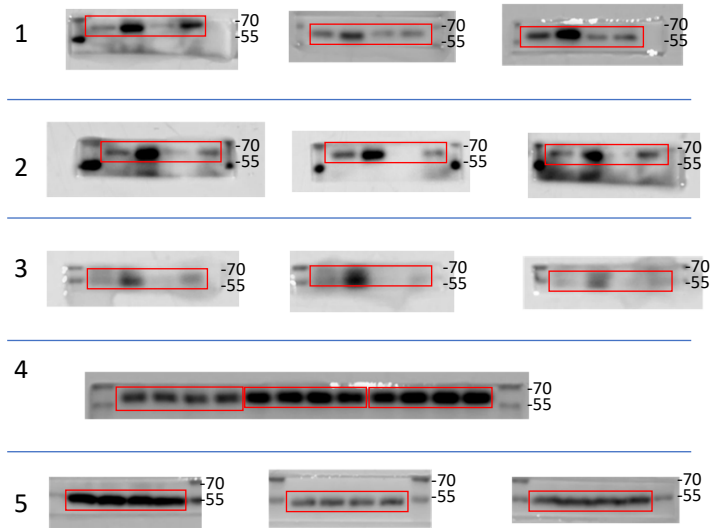

Figure 3G

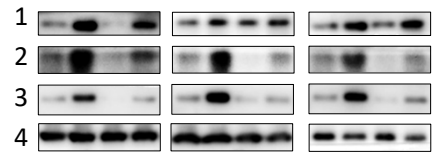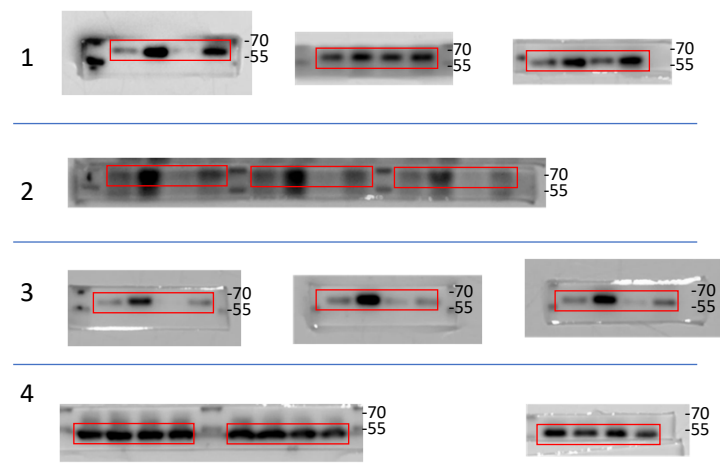

Figure 3L

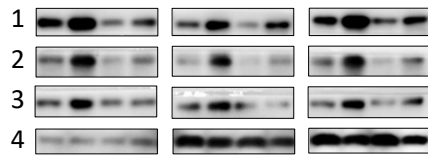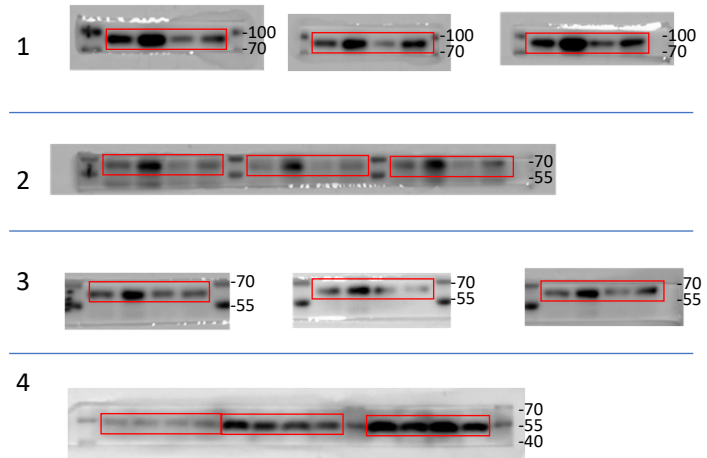

Figure 4A

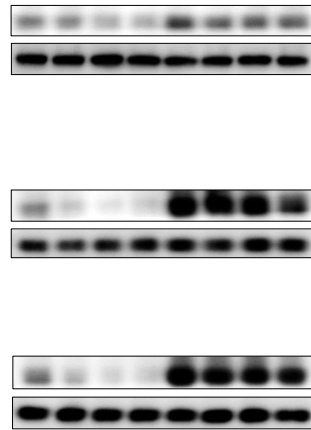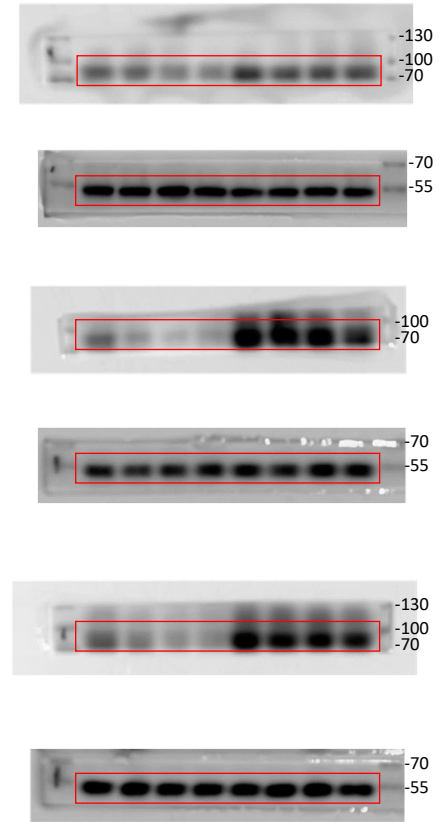

Figure 4B

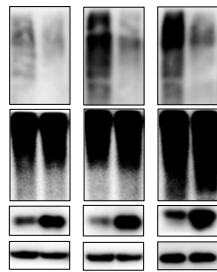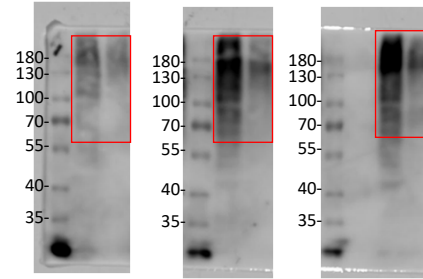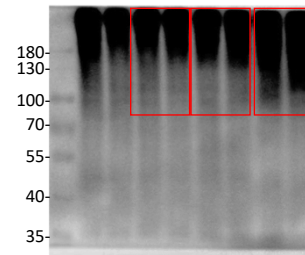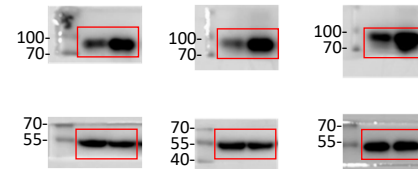

Figure 4C

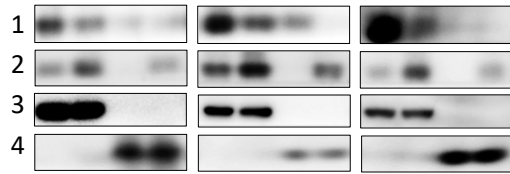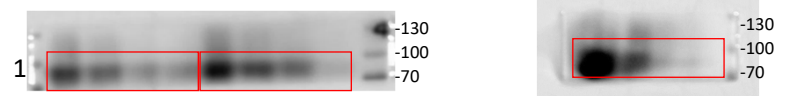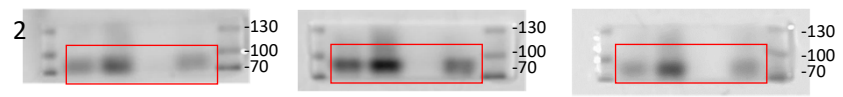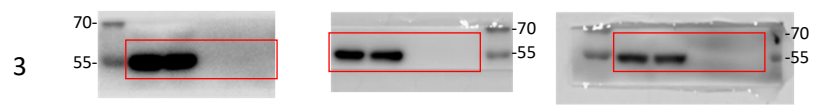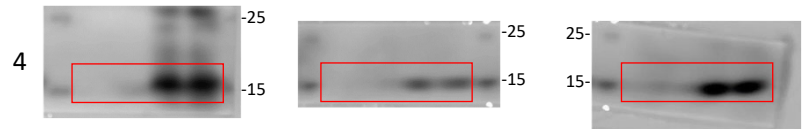



Figure 4D

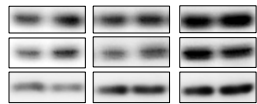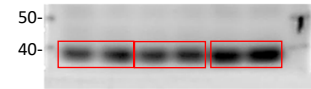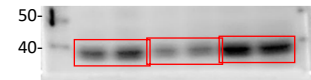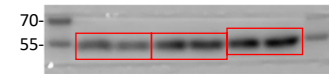

Figure 5A

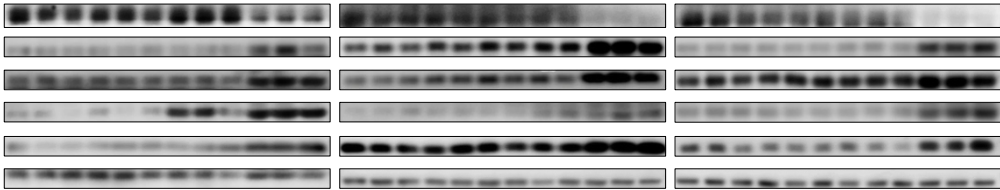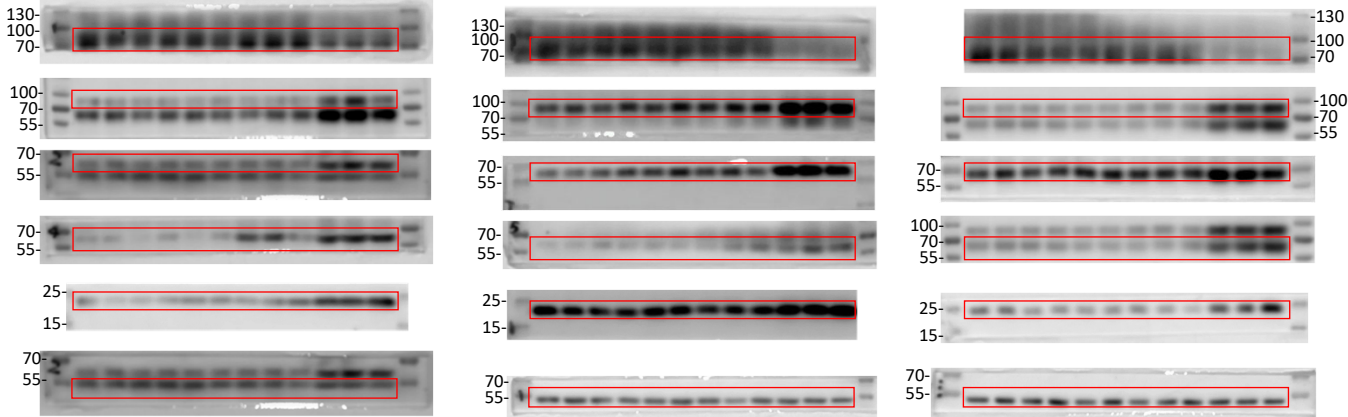

Figure 5C

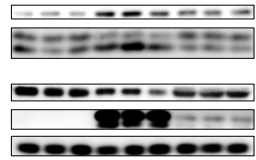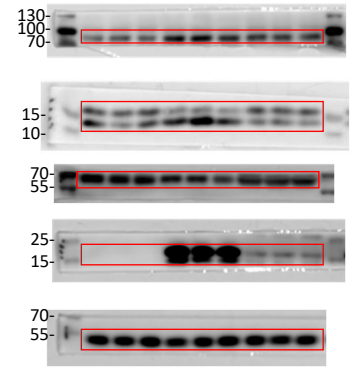

Figure 6A

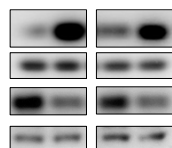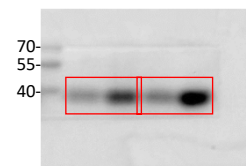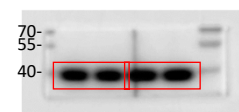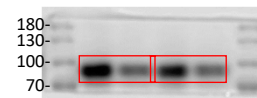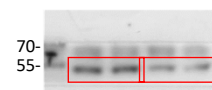

Figure 6B

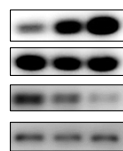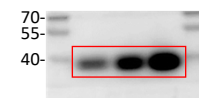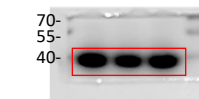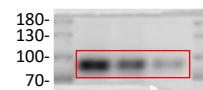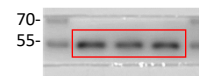

Figure 6C

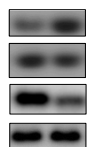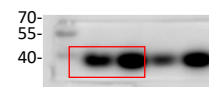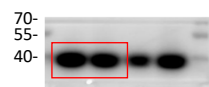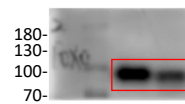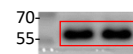

Figure 6D

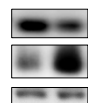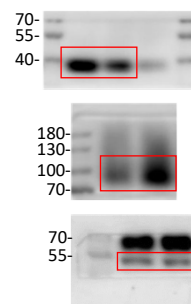

Figure 6F

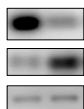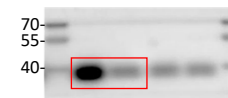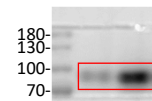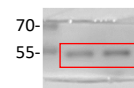



Figure 6H

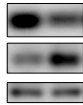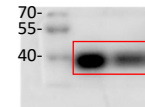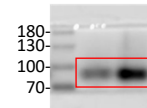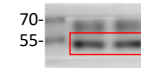

Figure 6J

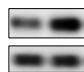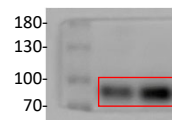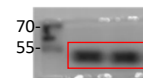

Figure 6M

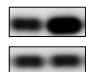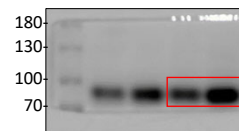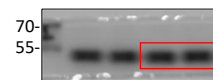

Figure 6P

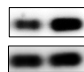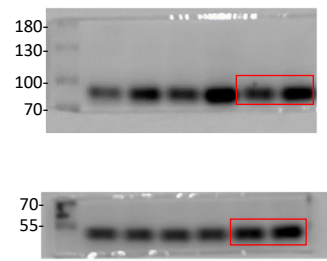

Supplementary Figure 1A

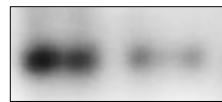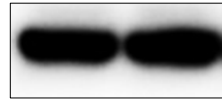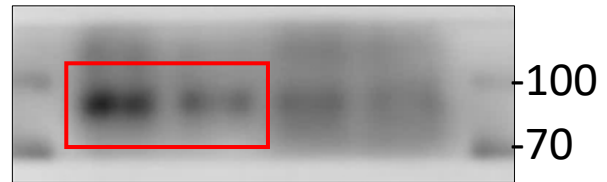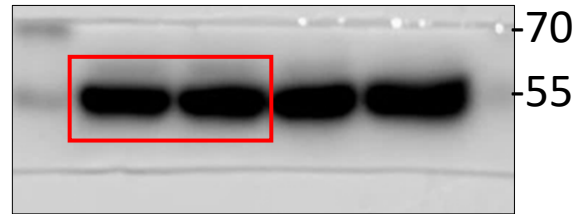

## Supplementary Figure 2C

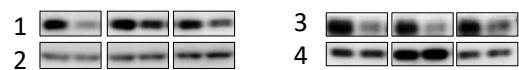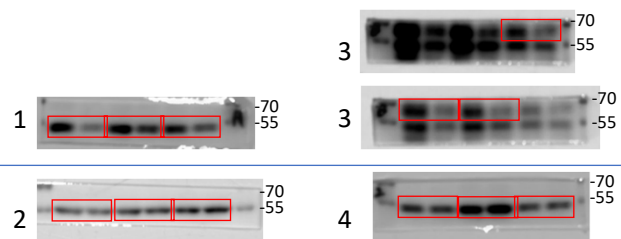

Supplementary Figure 3A

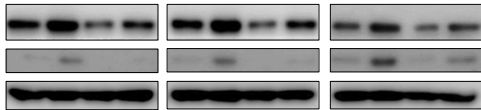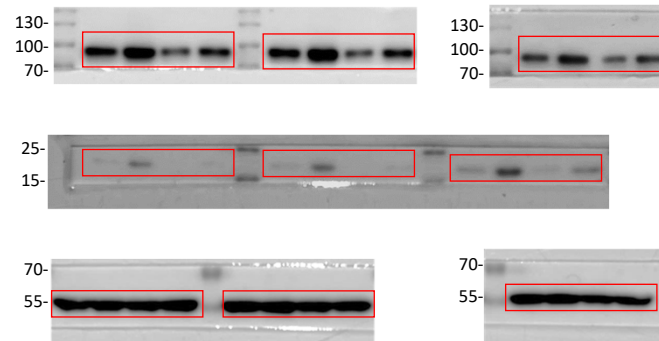

Supplementary Figure 3B

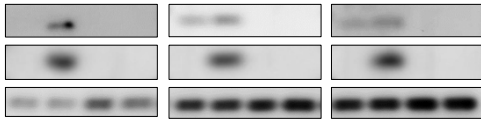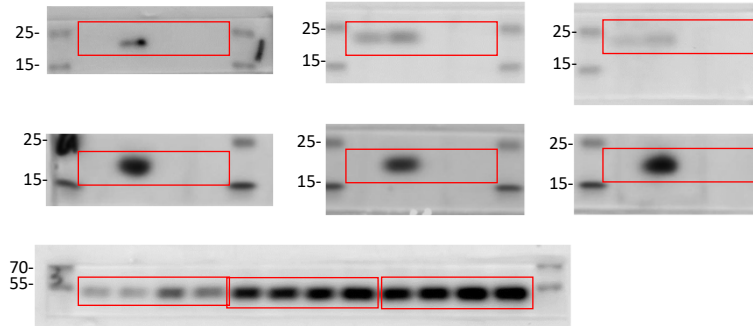



Supplementary Figure 3D

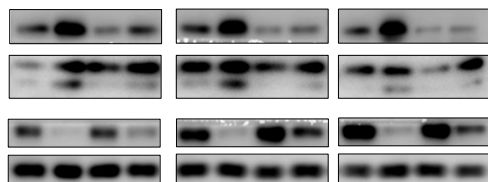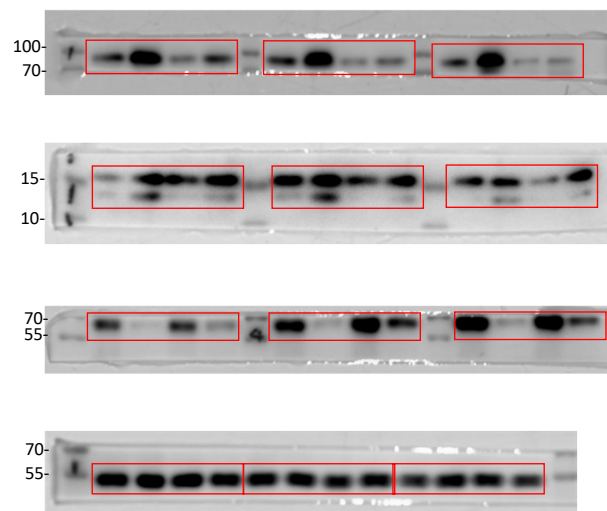

## Supplementary Figure 4B

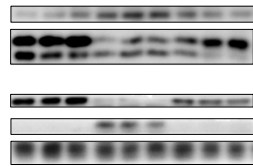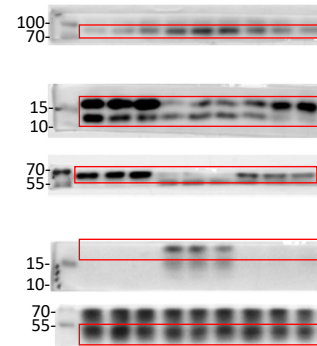

# Supplementary Figure 4G

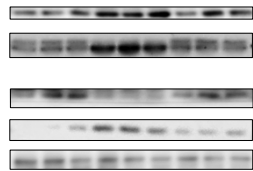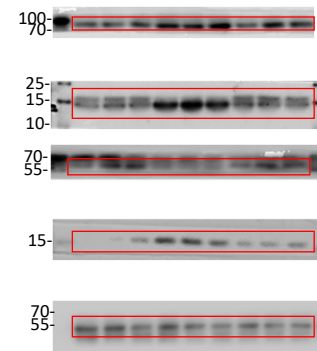

Supplement: 41417_2023_648_MOESM6_ESM.pdf [file 41417_2023_648_MOESM6_ESM.pdf]
